# Supplementary material for: OsmiR530 acts downstream of OsPIL15 to regulate grain yield in rice
Source: PubMed Central journal article supplement — New Phytol. 2020 Feb 6;226(3):823–37. doi: 10.1111/nph.16399 (PMC7187366; doi:10.1111/nph.16399), 2020-02-06
Supplement: NPH-226-823-s001.pdf [file NPH-226-823-s001.pdf]

## **New Phytologist Supporting Information**

Article title: **OsmiR530 acts downstream of OsPIL15 to regulate grain yield in rice**

Authors: Wei Sun, Xiao Hui Xu, Yaping Li, Lixia Xie, Yanan He, Wen Li, Xingbo Lu, Hongwei Sun, Xianzhi Xie

Article acceptance date: 15 December 2019

The following Supporting Information is available for this article:

**Fig. S1** Agronomic traits of OsmiR530-overexpressing (miR530-OE) and target mimic (MIM530) lines. **(a)** Results of the qRT-PCR analysis of the expression of OsmiR530 in rice miR530-OE lines. 5.8S rRNA was used as an internal control for qRT-PCR. Three biological replicates were analyzed. **(b)** Results of the qRT-PCR analysis of the expression of the OsmiR530 target mimic in MIM530 lines. *OsEF-1 $\alpha$*  was used as a reference gene for the qRT-PCR. Because the OsmiR530 target mimic was not expressed in rice wild-type (WT) plants, the expression level of the OsmiR530 target mimic in MIM530-#2 was set as the baseline. Three biological replicates were analyzed. **(c)** Rice transgenic and WT plants heights ( $n = 20$  plants). **(d)** Phenotypes of the main panicle of rice transgenic and WT plants. Scale bars, 5 cm. **(e)** Primary panicle lengths of rice transgenic and WT plants ( $n = 20$  panicles). **(f)** Seed-setting rates of rice transgenic and WT plants ( $n = 20$  panicles). **(g)** Spikelet hull lengths and widths in rice transgenic and WT plants ( $n = 20$  spikelets). For all histogram, the gray bar represents WT, blue bars represent miR530-OE transgenic lines #a1, #b5, and #c2 (from left to right), and red bars represent MIM530 transgenic lines #2, #3, and #6 (from left to right). The data in **(a)**, **(b)**, **(c)**, **(e)**, **(f)**, and **(g)** are presented as the mean  $\pm$  standard deviation. Significant differences were determined with Student's *t*-test (\*  $P < 0.05$ , \*\*  $P < 0.01$ ).

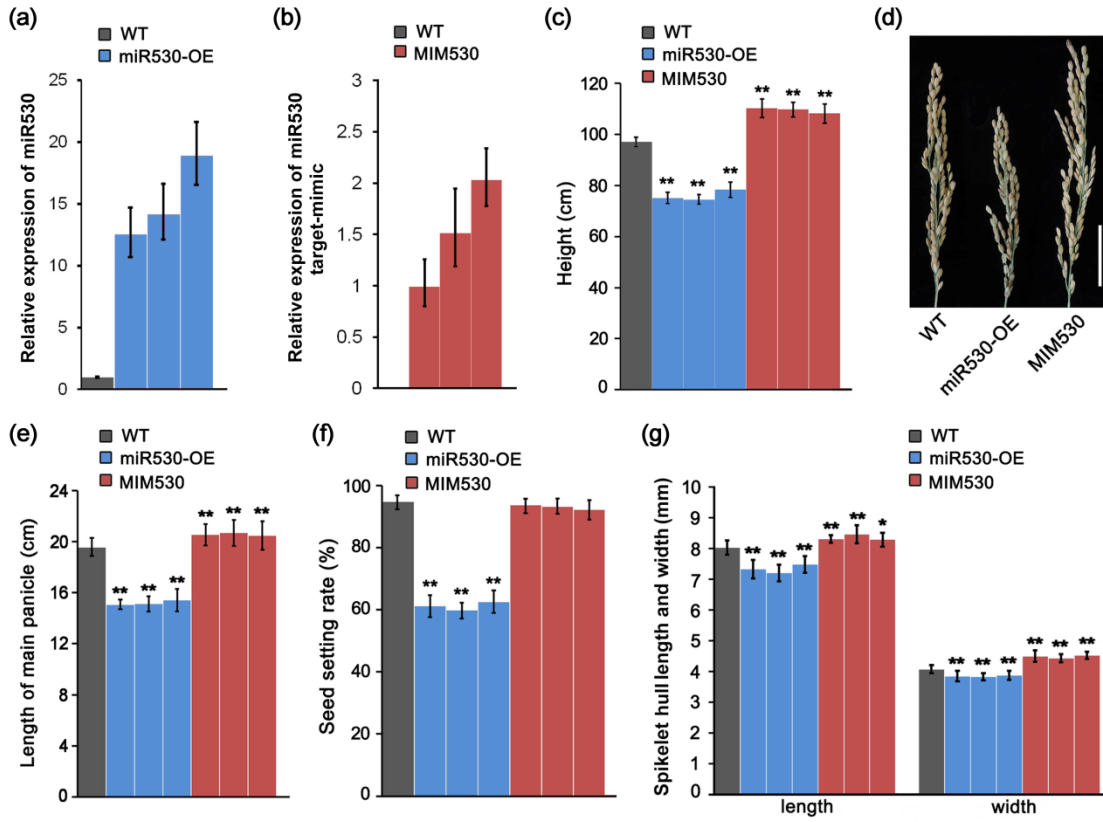

**Fig. S2** Comparison of the peduncle in miR530-overexpressing (miR530-OE), target mimic (MIM530) and wild-type (WT) plants. **(a)** Comparison of the peduncle diameters of rice transgenic and WT plants ( $n = 10$  plants). **(b)** Cross-sections of the peduncles of rice transgenic and WT plants. LV, large vascular bundles; SV, small vascular bundles. Scale bars, 200  $\mu\text{m}$ . Comparison of the number of LV **(c)** and SV **(d)** in the peduncles of rice transgenic and WT plants ( $n = 10$  plants). Data are presented as the mean  $\pm$  standard deviation. Significant differences were determined with Student's  $t$ -test (\*  $P < 0.05$ , \*\*  $P < 0.01$ ).

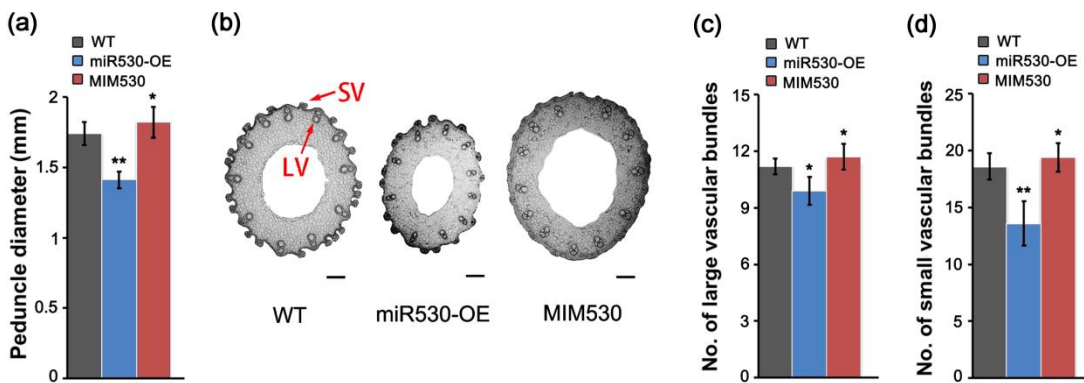

**Fig. S3** Expression of *OsmiR530* and *OsPL3* in various rice tissues. **(a)** Expression of *OsmiR530* in various rice tissues. R, root; IN, internode; FL, flag leaf; SP1, spikelet (0.5-1 cm long); SP2, spikelet (3-5 cm long); E, embryo; S, immature seed. 5.8S rRNA was used as an internal control for the qRT-PCR. Data are presented as the mean  $\pm$  standard deviation of three biological replicates. **(b)** Expression of *OsPL3* in various rice tissues. R, root; IN, internode; FL, flag leaf; SP1, spikelet (0.5-1 cm long); SP2, spikelet (3-5 cm long); E, embryo; S, immature seed. *OsEF1 $\alpha$*  was used as a reference gene for the qRT-PCR. Data are presented as the mean  $\pm$  standard deviation of three biological replicates.

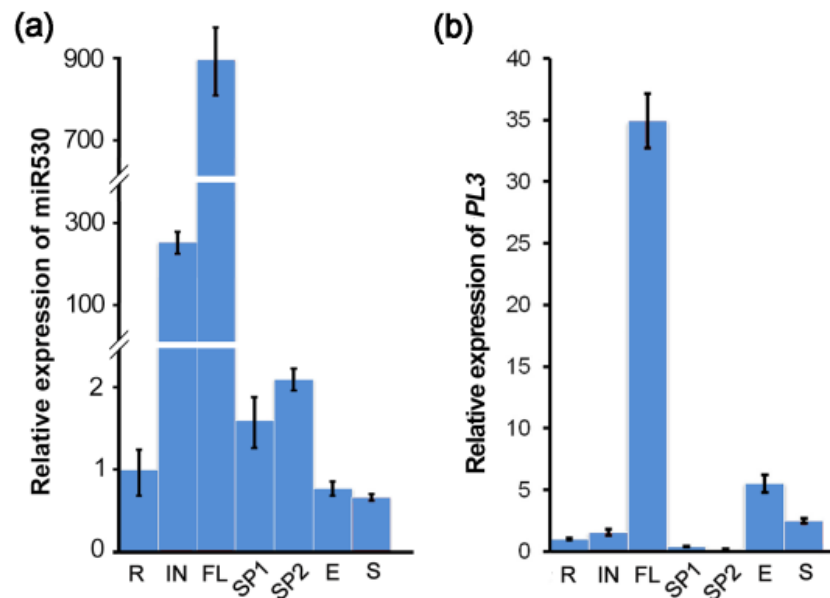

**Fig. S4** Diagram of two single-guide RNAs (sgRNAs) targeting *OsPL3* in the rice genome.

Target sites are marked in red, whereas the protospacer-adjacent motif (PAM) is marked in green.

Sequences in boxes are the target sequences in the wild-type (WT) rice. Black dashes represent deleted bases and inserted nucleotides are indicated with red lowercase letters.

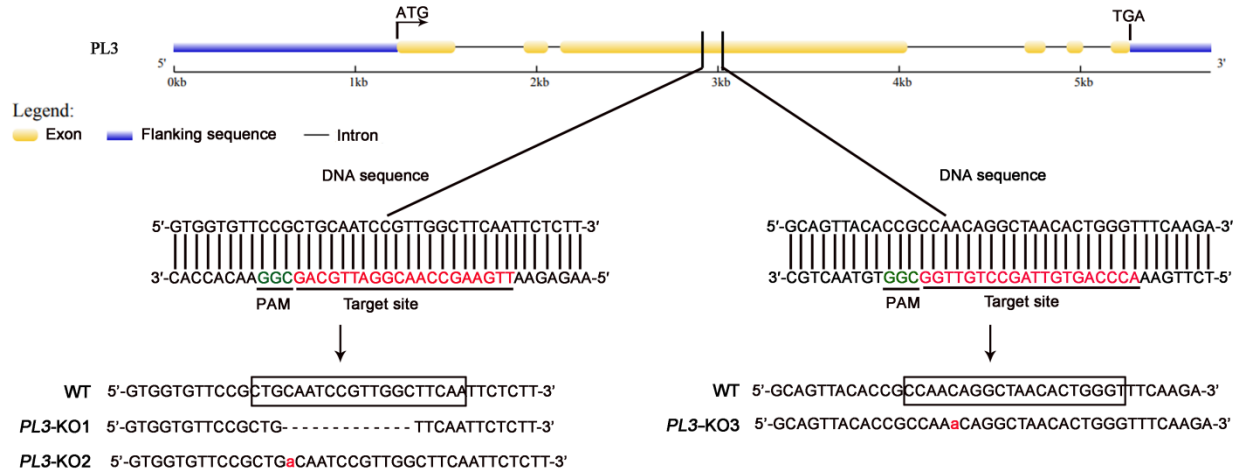

**Fig. S5** Analysis of the OsPL3 protein sequence of in the wild-type (WT) and *OsPL3*-knockout (*PL3*-KO) lines. **(a)** Protein structure of OsPL3 in rice WT and *PL3*-KO lines. **(b)** Changes in the OsPL3 amino acid sequences in *PL3*-KO lines.

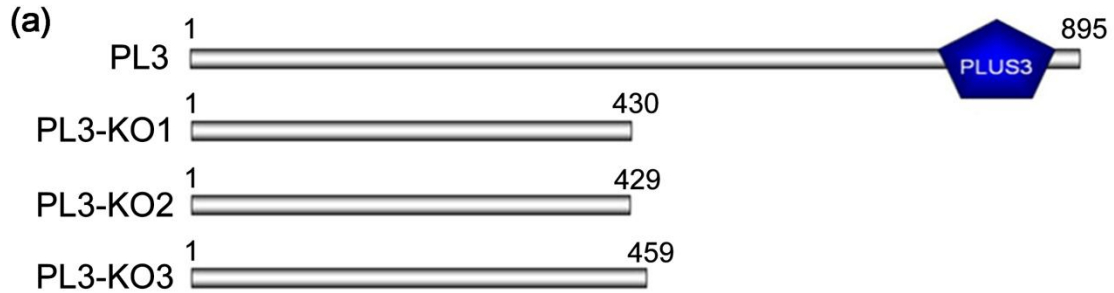

**(b)**

|             |                                                                                                                             |     |
|-------------|-----------------------------------------------------------------------------------------------------------------------------|-----|
| PL3-KO1.seq | MRSVSELVWSPDEGLSIRKIAAASLSTRKTSLHWNADTLIVISSPQQSGAGESGHIIDATVEDAEKMFQCLRTSPSSARVFMSSPSRIRNTDAQQSTIRSHGQDSWYCGGMVWNEGK       | 120 |
| PL3-KO2.seq | MRSVSELVWSPDEGLSIRKIAAASLSTRKTSLHWNADTLIVISSPQQSGAGESGHIIDATVEDAEKMFQCLRTSPSSARVFMSSPSRIRNTDAQQSTIRSHGQDSWYCGGMVWNEGK       | 120 |
| PL3-KO3.seq | MRSVSELVWSPDEGLSIRKIAAASLSTRKTSLHWNADTLIVISSPQQSGAGESGHIIDATVEDAEKMFQCLRTSPSSARVFMSSPSRIRNTDAQQSTIRSHGQDSWYCGGMVWNEGK       | 120 |
| WT.seq      | MRSVSELVWSPDEGLSIRKIAAASLSTRKTSLHWNADTLIVISSPQQSGAGESGHIIDATVEDAEKMFQCLRTSPSSARVFMSSPSRIRNTDAQQSTIRSHGQDSWYCGGMVWNEGK       | 120 |
| Consensus   | mrsvselvwspeqlsirkiaaaslstrktslhwadtlivisspqqsgagesghiidatvedaeakmpqlrtspssarvfmsspsrirntdaqgstirshgqdsyccgmvwneqk          |     |
| PL3-KO1.seq | ETSDNFCVDRLEKEDEVGSCPTRYCNDTSHSLGASRREVMPIIAEKQAFCAITVHDERSWAANAWRARLVRAISQKDSVLFKNADNIHSTSAFGSIGNTENMPGKLTSLGNRNDSSQD      | 240 |
| PL3-KO2.seq | ETSDNFCVDRLEKEDEVGSCPTRYCNDTSHSLGASRREVMPIIAEKQAFCAITVHDERSWAANAWRARLVRAISQKDSVLFKNADNIHSTSAFGSIGNTENMPGKLTSLGNRNDSSQD      | 240 |
| PL3-KO3.seq | ETSDNFCVDRLEKEDEVGSCPTRYCNDTSHSLGASRREVMPIIAEKQAFCAITVHDERSWAANAWRARLVRAISQKDSVLFKNADNIHSTSAFGSIGNTENMPGKLTSLGNRNDSSQD      | 240 |
| WT.seq      | ETSDNFCVDRLEKEDEVGSCPTRYCNDTSHSLGASRREVMPIIAEKQAFCAITVHDERSWAANAWRARLVRAISQKDSVLFKNADNIHSTSAFGSIGNTENMPGKLTSLGNRNDSSQD      | 240 |
| Consensus   | etsdnfcvdrlekedevgscptrycndtshslgsasrrevmpiiiaekeqafcaitvhderswaanawrarlvraisqkdsvlfnknadnihstsafigsigntenmpgkltslgnrndssqd |     |
| PL3-KO1.seq | QAMQEKHKDGLIVARCESYSAVNPVAVARCELASGVNPLARHSTSGCNPRKLEKGEKELIYDMNCVSNITNEGDDSNESIESCPSTKAPKRKHGQFSAAEMTSGNKRCRREDNESSCGLF    | 360 |
| PL3-KO2.seq | QAMQEKHKDGLIVARCESYSAVNPVAVARCELASGVNPLARHSTSGCNPRKLEKGEKELIYDMNCVSNITNEGDDSNESIESCPSTKAPKRKHGQFSAAEMTSGNKRCRREDNESSCGLF    | 360 |
| PL3-KO3.seq | QAMQEKHKDGLIVARCESYSAVNPVAVARCELASGVNPLARHSTSGCNPRKLEKGEKELIYDMNCVSNITNEGDDSNESIESCPSTKAPKRKHGQFSAAEMTSGNKRCRREDNESSCGLF    | 360 |
| WT.seq      | QAMQEKHKDGLIVARCESYSAVNPVAVARCELASGVNPLARHSTSGCNPRKLEKGEKELIYDMNCVSNITNEGDDSNESIESCPSTKAPKRKHGQFSAAEMTSGNKRCRREDNESSCGLF    | 360 |
| Consensus   | qamqekhkdgliivarcesyavnpvarcelasgvnplarhestsgcnprklekgekeliydmncvsnitnegddsnesiescpstkapkrkhgqfsaaemtsgnkrcreddnesccglf     |     |
| PL3-KO1.seq | HKNDSSFFNMSTLTNGVKVFDETTAVPLNQRKFSAAATGEEFPTNFVPLQNNCGVPLASILEFNIIVRML.....                                                 | 430 |
| PL3-KO2.seq | HKNDSSFFNMSTLTNGVKVFDETTAVPLNQRKFSAAATGEEFPTNFVPLQNNCGVPLIRWQCFSSISL.....                                                   | 429 |
| PL3-KO3.seq | HKNDSSFFNMSTLTNGVKVFDETTAVPLNQRKFSAAATGEEFPTNFVPLQNNCGVPLQSVGNSHLSQSLYSQNVMTSRNTCHQSESSYTAKQANTGFQE.....                    | 459 |
| WT.seq      | HKNDSSFFNMSTLTNGVKVFDETTAVPLNQRKFSAAATGEEFPTNFVPLQNNCGVPLQSVGNSHLSQSLYSQNVMTSRNTCHQSESSYTAARLTLGFRSKRFVSMGRELTINVAETLTAAG   | 480 |
| Consensus   | hkndssffnmstltngvkvfdeettavplnqrkfsaatgeefptnfvplqnncgvplf                                                                  |     |
| PL3-KO1.seq | .....                                                                                                                       | 430 |
| PL3-KO2.seq | .....                                                                                                                       | 429 |
| PL3-KO3.seq | RIQMDSYGDGRGAFQWGIIFLRAERNQNGFHGSSNAASGHKDDFSESIVSRLLKPTFMKVMWDTTRCDEETDFCSANFKGLGDSSSPQDFWVRELNNSQYFTSKGSDNETTSSCAA        | 459 |
| WT.seq      | .....                                                                                                                       | 600 |
| Consensus   | .....                                                                                                                       |     |
| PL3-KO1.seq | .....                                                                                                                       | 430 |
| PL3-KO2.seq | .....                                                                                                                       | 429 |
| PL3-KO3.seq | FQDENKFEETMASIFAKRLDALRHANTSAVHVAITCDHGTFRGRNHKTSFVSVYNSHDEQESGQKTHRSSGGEGRIVLWTKGKGEQLSEGNDRDELGEKVLKSHENQCEGSSDGKVVV      | 720 |
| WT.seq      | .....                                                                                                                       |     |
| Consensus   | .....                                                                                                                       |     |
| PL3-KO1.seq | .....                                                                                                                       | 430 |
| PL3-KO2.seq | .....                                                                                                                       | 429 |
| PL3-KO3.seq | FKCNLETNYIIIEIDRRKRLQNHGAFNSMENQFDNKQWVYGIIVFDVYDEASVFGALQRLRLSRSDIIRWHRFSVMHTLIDGFFLLRFRGWEEALGGTYHVARINGLDKRNLSVT         | 840 |
| WT.seq      | .....                                                                                                                       |     |
| Consensus   | .....                                                                                                                       |     |
| PL3-KO1.seq | .....                                                                                                                       | 430 |
| PL3-KO2.seq | .....                                                                                                                       | 429 |
| PL3-KO3.seq | .....                                                                                                                       | 459 |
| WT.seq      | IRNSTCQVDSRFVSNHDFHQDELKAWWSAAMKSGWKLFSQEELNTRLERELLA                                                                       | 894 |
| Consensus   | .....                                                                                                                       |     |

**Fig. S6** Agronomic traits of *OsPL3*-knockout (*PL3*-KO) lines. **(a)** The rice *PL3*-KO and wild-type (WT) plant heights ( $n = 20$  plants). **(b)** Phenotypes of the main panicle of rice *PL3*-KO and WT plants. **(c)** Primary panicle lengths of rice *PL3*-KO and WT plants ( $n = 20$  panicles). **(d)** Number of primary branches per main panicle in rice *PL3*-KO and WT plants. **(e)** Seed-setting rates of rice *PL3*-KO and WT plants ( $n = 20$  panicles). For all histograms, the gray bar represents WT and green bars represent *PL3*-KO transgenic lines #12, #13, and #16 (from left to right). The data in **(a)** and **(c–e)** are presented as the mean  $\pm$  standard deviation. Significant differences were determined with Student's *t*-test (\*  $P < 0.05$ , \*\*  $P < 0.01$ ).

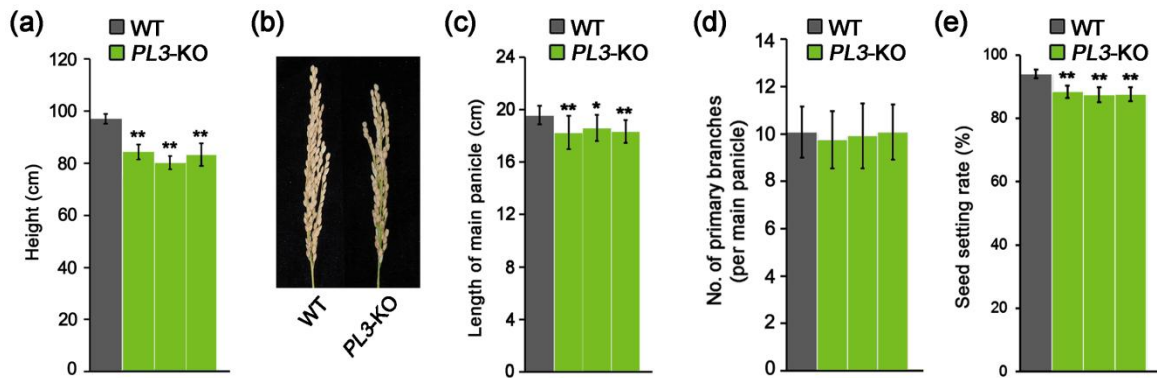

**Fig. S7** Diagram of two single-guide RNAs (sgRNAs) targeting *OsPIL15* in the rice genome. Target sites are marked in red, whereas the protospacer-adjacent motif (PAM) is marked in green. Sequences in boxes are the target sequences in the wild-type (WT) rice. Black dashes represent deleted bases and inserted nucleotides are indicated with red lowercase letters.

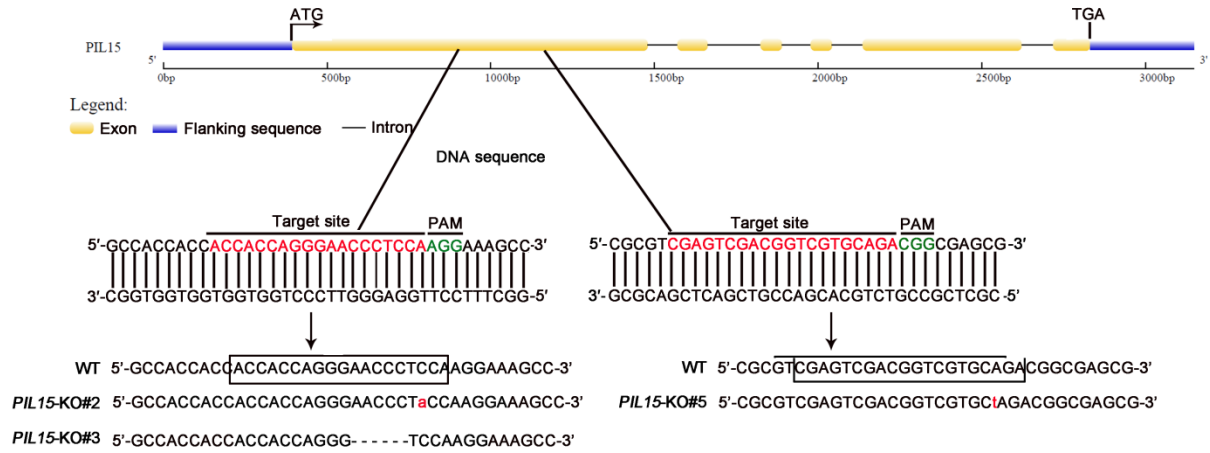



**Fig. S8** Analysis of the OsPIL15 protein sequence in the rice wild-type (WT) and *OsPIL15*-knockout (*PIL15*-KO) lines.

|                |                                                                                                                                                                            |     |
|----------------|----------------------------------------------------------------------------------------------------------------------------------------------------------------------------|-----|
| WT.seq         | MSDGNDFAE <del>LLWENGQAVVHGRKKHPQAFPPFFGFGGTGGGGGSSSRAQERQ</del> PGGIDAF <del>AKVGGGFGALGMAPAVHDF</del>                                                                    | 80  |
| PL15-KO#2.seq  | MSDGNDFAE <del>LLWENGQAVVHGRKKHPQAFPPFFGFGGTGGGGGSSSRAQERQ</del> PGGIDAF <del>AKVGGGFGALGMAPAVHDF</del>                                                                    | 80  |
| PIL15-KO#3.seq | MSDGNDFAE <del>LLWENGQAVVHGRKKHPQAFPPFFGFGGTGGGGGSSSRAQERQ</del> PGGIDAF <del>AKVGGGFGALGMAPAVHDF</del>                                                                    | 80  |
| PIL15-KO#5.seq | MSDGNDFAE <del>LLWENGQAVVHGRKKHPQAFPPFFGFGGTGGGGGSSSRAQERQ</del> PGGIDAF <del>AKVGGGFGALGMAPAVHDF</del>                                                                    | 80  |
| Consensus      | msdgndfaellwengqavvhgrkkhpqafppffgfggtgggggssssraqerqppgidafakvgggfgalgmavpavhdf                                                                                           |     |
|                |                                                                                                                                                                            |     |
| WT.seq         | ASGFGATTQDNGDDDTVPWIHYPIIDDEDA <del>AAAPAALAAADYGSDF</del> FSEIQAAAAAAAAA <del>APPTDLASLPASNHN</del> GATNNR                                                                | 160 |
| PL15-KO#2.seq  | ASGFGATTQDNGDDDTVPWIHYPIIDDEDA <del>AAAPAALAAADYGSDF</del> FSEIQAAAAAAAAA <del>APPTDLASLPASNHN</del> GATNNR                                                                | 160 |
| PIL15-KO#3.seq | ASGFGATTQDNGDDDTVPWIHYPIIDDEDA <del>AAAPAALAAADYGSDF</del> FSEIQAAAAAAAAA <del>APPTDLASLPASNHN</del> GATNNR                                                                | 160 |
| PIL15-KO#5.seq | ASGFGATTQDNGDDDTVPWIHYPIIDDEDA <del>AAAPAALAAADYGSDF</del> FSEIQAAAAAAAAA <del>APPTDLASLPASNHN</del> GATNNR                                                                | 160 |
| Consensus      | asfggattqdnngdddtvpwihypiiddedaaapaalaaadygsdffselqaaaaaaaaapptdlaslpasnhngatnnr                                                                                           |     |
|                |                                                                                                                                                                            |     |
| WT.seq         | NAPVATTTTR... <del>EPSKESHGGLSVETTR</del> EFQ <del>QPQLAAAKLFR</del> SSGSGGEGVMN <del>FLFSRFAV</del> LARATLES <del>AGRTQ</del> G                                           | 237 |
| PL15-KO#2.seq  | NAPVATTTTREPYQ <del>GKPRR</del> FV <del>GS</del> HH <del>SRRA</del> AAAA <del>TARRSQAA</del> SVER <del>QRRRRGR</del> DELLALL <del>PPGRF</del> ...GEGDAGE <del>BRAED</del>  | 235 |
| PIL15-KO#3.seq | NAPVATTTTR...VQ <del>GKPRR</del> FV <del>GS</del> HH <del>SRRA</del> AAAA <del>TARRSQAA</del> SVER <del>QRRRRGR</del> DELLALL <del>PPGRF</del> ...GEGDAGE <del>BRAED</del> | 233 |
| PIL15-KO#5.seq | NAPVATTTTR... <del>EPSKESHGGLSVETTR</del> EFQ <del>QPQLAAAKLFR</del> SSGSGGEGVMN <del>FLFSRFAV</del> LARATLES <del>AGRTQ</del> G                                           | 237 |
| Consensus      | napvat <del>tttr</del> ... g p a a a r g r p r                                                                                                                             |     |
|                |                                                                                                                                                                            |     |
| WT.seq         | TDNKASNV <del>TASN</del> RVESTV <del>V</del> QTASGPR <del>SAPAFADQRAAAWPPQKEMP</del> FASTAAAPMA <del>FAVNLHHEMGRDRAGRT</del> MPVHKT                                        | 317 |
| PL15-KO#2.seq  | AGHRQZ.....                                                                                                                                                                | 241 |
| PIL15-KO#3.seq | AGHRQZ.....                                                                                                                                                                | 239 |
| PIL15-KO#5.seq | TDNKASNV <del>TASN</del> RVESTV <del>V</del> LDGERAKERTG <del>VRRSEGGGVA</del> AAAE <del>GD</del> AVRVH <del>GS</del> RS <del>HGFGRZ</del> .....                           | 298 |
| Consensus      |                                                                                                                                                                            |     |
|                |                                                                                                                                                                            |     |
| WT.seq         | EARKAPEATVATSSVCSGNGAGS <del>DELWRQ</del> Q <del>KRKCAQA</del> EC <del>SASQ</del> DDDL <del>DDEPGVLRKSGTR</del> STKRSRTAEVH <del>NLSERRRR</del>                            | 397 |
| PL15-KO#2.seq  | .....                                                                                                                                                                      | 241 |
| PIL15-KO#3.seq | .....                                                                                                                                                                      | 239 |
| PIL15-KO#5.seq | .....                                                                                                                                                                      | 298 |
| Consensus      |                                                                                                                                                                            |     |
|                |                                                                                                                                                                            |     |
| WT.seq         | DRINEKMRALQELIPNCNKIDKASMLDEAIEYLKTLQLQVQMMSMG <del>TGLCIP</del> PMLLPTAMQHLQIP <del>PM</del> AHFPHLGMGLGY                                                                 | 477 |
| PL15-KO#2.seq  | .....                                                                                                                                                                      | 241 |
| PIL15-KO#3.seq | .....                                                                                                                                                                      | 239 |
| PIL15-KO#5.seq | .....                                                                                                                                                                      | 298 |
| Consensus      |                                                                                                                                                                            |     |
|                |                                                                                                                                                                            |     |
| WT.seq         | GMGVFDM <del>SNTGALQMP</del> MPGAHFPC <del>PMIPGAS</del> PQGLGIPGTST <del>MPMFGV</del> PGQTI <del>PSSASSV</del> PPFASLAGLPVR <del>PSG</del> V <del>PQV</del>               | 557 |
| PL15-KO#2.seq  | .....                                                                                                                                                                      | 241 |
| PIL15-KO#3.seq | .....                                                                                                                                                                      | 239 |
| PIL15-KO#5.seq | .....                                                                                                                                                                      | 298 |
| Consensus      |                                                                                                                                                                            |     |
|                |                                                                                                                                                                            |     |
| WT.seq         | SGAMANMVQDQQGGIANQQ <del>QCLNKEA</del> IQGAN <del>PGDS</del> QM <del>QIIM</del> QGD <del>NENFRIP</del> SSAQTKSS <del>QFSDGTG</del> KGTNARERDGAET                           | 637 |
| PL15-KO#2.seq  | .....                                                                                                                                                                      | 241 |
| PIL15-KO#3.seq | .....                                                                                                                                                                      | 239 |
| PIL15-KO#5.seq | .....                                                                                                                                                                      | 298 |
| Consensus      |                                                                                                                                                                            |     |

**Fig. S9** Expression of OsmiR530 in rice *OsPIL15* transgenic lines. The expression of mature OsmiR530 in *OsPIL15*-overexpressing (*PIL15*-OE) and knockout (*PIL15*-KO) lines. 5.8S rRNA was used as an internal control for the qRT-PCR. Data are presented as the mean  $\pm$  standard deviation of three biological replicates.

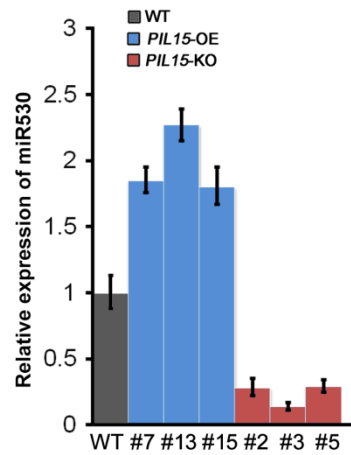

**Fig. S10** Alignment of mature miR530 sequences identified in miRBase. tae, *Triticum aestivum*; mdm, *Malus domestica*; stu, *Solanum tuberosum*; ppe, *Prunus persica*; eun, *Eugenia uniflora*; mtr, *Medicago truncatula*; gma, *Glycine max*; cme, *Cucumis melo*; tcc, *Theobroma cacao*; fve, *Fragaria vesca*; aqc, *Aquilegia caerulea*; bdi, *Brachypodium distachyon*; ptc, *Populus trichocarpa*; csi, *Citrus sinensis*; lus, *Linum usitatissimum*; htu, *Helianthus tuberosus*; mes, *Manihot esculenta*; gra, *Gossypium raimondii*; sly, *Solanum lycopersicum*.

|                |                           |    |
|----------------|---------------------------|----|
| tae-miR530     | ---UGCAGUGGCAUAUGCAACUCU  | 21 |
| mdm-miR530a    | ---UGCAUUUGCACCUGCACUUGU  | 21 |
| mdm-miR530b    | ---UGCAUUUGCACCUGCACUUGU  | 21 |
| mdm-miR530c    | ---UGCAUUUGCACCUGCACUUGU  | 21 |
| stu-miR530     | -UCUGCAUUUGCACCUGCACCU--  | 21 |
| ppe-miR530     | -UCUGCAUUUGCACCUGCACCU--  | 21 |
| eun-miR530-5p  | -UCUGCAUUUGCACCUGCACCU--  | 21 |
| mtr-miR530     | ---UGCAUUUGCACCUGCACUUUC  | 21 |
| gma-miR530a    | ---UGCAUUUGCACCUGCACUUU-  | 20 |
| gma-miR530b    | ---UGCAUUUGCACCUGCACUUUA  | 21 |
| gma-miR530c    | ---UGCAUUUGCACCUGCACUUUA  | 21 |
| gma-miR530d    | ---UGCAUUUGCACCUGCACUUUA  | 21 |
| gma-miR530e    | ---UGCAUUUGCACCUGCACUUUA  | 21 |
| cme-miR530b    | ---UGCAUUUGCACCUACACCUU-  | 20 |
| tcc-miR530a    | ---UGCAUUUGCACCUGCACCU--  | 20 |
| fve-miR530     | ---UGCAUUUGCACCUGCACCUU   | 21 |
| aqc-miR530     | ---UGCAUUUGCACCUGCAUCUC-  | 20 |
| OsmiR530       | ---UGCAUUUGCACCUGCACCUAC  | 21 |
| bdi-miR530a    | ---UGCAUUUGCACCUGCACCUAC  | 21 |
| bdi-miR530b    | ---UGCAUUUGCACCUGCACCUAC  | 21 |
| ptc-miR530b    | ---UGCAUUUGCACCUGCAUCUU-  | 20 |
| csi-miR530b-5p | ---UGCAUUUGCACCUGCAUCUUG  | 21 |
| mes-miR530b    | ---UGCAUUUGCACCUGCACCUUA  | 21 |
| ptc-miR530a    | ---UGCAUUUGCACCUGCACCUU-  | 20 |
| csi-miR530a-5p | ---UGCAUUUGCACCUGCACCUUG  | 21 |
| tcc-miR530b    | ---UGCAUUUGCACCUGCACCUU-  | 20 |
| lus-miR530a    | ---UGCAUUUGCACCUGCACCUU-  | 20 |
| lus-miR530b    | ---UGCAUUUGCACCUGCACCUU-  | 20 |
| htu-miR530     | ---UGCAUUUGCACCUGCACCUU-  | 20 |
| cme-miR530a    | ---UGCAUUUGCACCUGCACCUU-  | 20 |
| mes-miR530a    | ---UGCAUUUGCACCUGCACCUU-  | 20 |
| gra-miR530a    | AGGUGCAGAUGCAGUUGCAGG---  | 21 |
| gra-miR530b    | AGGUGCAGGUGCAGGCGCAGC---  | 21 |
| sly-miR530     | AGGUGUAGGUGUUC AUGCAGA--- | 21 |

\*\* \* \* \*\*

**Fig. S11** PHYB physically interacts with OsPIL15. **(a)** Yeast two-hybrid analysis of the interaction between PHYB and OsPIL15. The full-length *OsPIL15* open reading frame and the C-terminal *PHYB* cDNA sequences were inserted into GAL4-AD and GAL4-BD vectors to generate AD-*OsPIL15* and BD-*PHYB-C* constructs, respectively. Yeast AH109 cells were co-transformed with the two constructs. The AD/BD-*PHYB-C* combination was used as a negative control. Transformed yeast cells were selected on synthetic dextrose medium lacking Leu and Trp (SD/-L/-W) and then transferred to medium lacking Leu, Trp and His (SD/-L/-W/-H). **(b)** A firefly luciferase complementation imaging (LCI) assay revealed the interaction between PHYB and OsPIL15 in *Nicotiana benthamiana* leaves. The constructs are listed on the right. The signals were analyzed at 48 h after the infiltrations. At least 10 independent *N. benthamiana* leaves were infiltrated for each experiment. **(c)** Semi-*in vivo* pull-down assays confirming that PHYB specifically interacts with OsPIL15 under red light conditions.

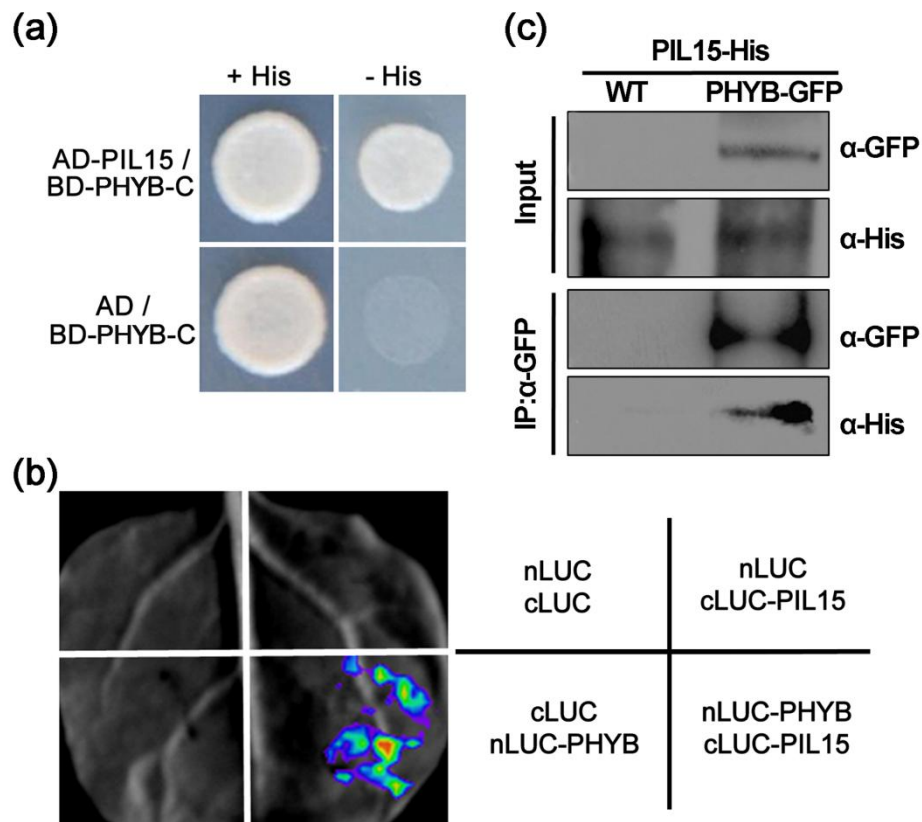

**Fig. S12** Knockout of *PHYB* in rice results in smaller seed. **(a)** Grains with hulls of wild-type (WT) and *phyB* mutant. Bar, 1 cm. **(b)** Grain length and width of WT and *phyB* mutant. **(c)** The 1,000-grain weight of WT and *phyB* mutant. The data in **(b)** and **(c)** are presented as the mean  $\pm$  standard deviation (**b**,  $n > 300$  seeds; **c**,  $n = 3$  replicates). Significant differences were determined with Student's *t*-test (\*  $P < 0.05$ , \*\*  $P < 0.01$ ).

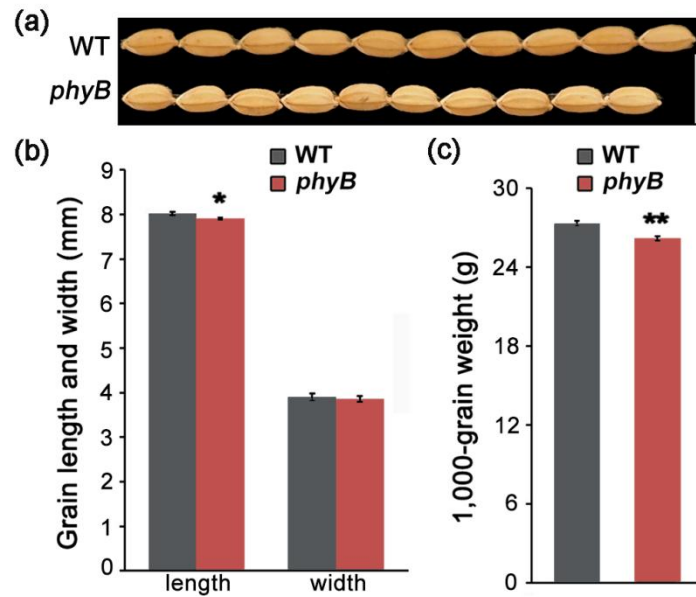

**Table S1** Details regarding the primers and DNA fragments used in this study.

|             |                                                                                                                                                                                                                                                                                                                  |                                                                        |
|-------------|------------------------------------------------------------------------------------------------------------------------------------------------------------------------------------------------------------------------------------------------------------------------------------------------------------------|------------------------------------------------------------------------|
| miR530-OE-F | 5'-gg actagtATGCTCATTGATTGAAACTTC-3'                                                                                                                                                                                                                                                                             | For OsmiR530 overexpression construct                                  |
| miR530-OE-R | 5'-cg g gatccCTGATCCACGTGTAAACCG-3'                                                                                                                                                                                                                                                                              |                                                                        |
| osa-5.8S    | 5'-GAACGACTCTCGGCGGCTA-3'                                                                                                                                                                                                                                                                                        | For detecting the expression of the 5.8S rRNA by qRT-PCR               |
| osa-miR530  | 5'-cgccTGCATTTGCACCTGCACCTAC-3'                                                                                                                                                                                                                                                                                  | For detecting the expression of the mature OsmiR530 by qRT-PCR         |
| MIM530-RF1  | 5'-TCTCTCTTCTCTATGCTTTG-3'                                                                                                                                                                                                                                                                                       | For detecting OsmiR530 target mimic by qRT-PCR                         |
| MIM530-RR1  | 5'-CACTGGTCTGACTATTCTC-3'                                                                                                                                                                                                                                                                                        |                                                                        |
| miR530Pre-F | 5'-AGGAAGATGAAGCAGCAA-3'                                                                                                                                                                                                                                                                                         | For detecting the precursor of OsmiR530 by qRT-PCR                     |
| miR530Pre-R | 5'-AAGAGACCAGGAACAACAT-3'                                                                                                                                                                                                                                                                                        |                                                                        |
| IPS1-F      | 5'-caccAAACACCACAAAAACAAAAGA-3'                                                                                                                                                                                                                                                                                  | For OsmiR530 target mimic construct (MIM530)                           |
| IPS1-R      | 5'-ACTATAAAGAGAATCGGAAGCA-3'                                                                                                                                                                                                                                                                                     |                                                                        |
| MIM530-F    | 5'-AATAGGTGCAGGTGTTGCAAATGCAAGCTTCGGTCCCCCTC-3'                                                                                                                                                                                                                                                                  |                                                                        |
| MIM530-R    | 5'-CT TGCATTTGCAACACCTGCACCTA TTTCTAGAGGGAGATAA-3'                                                                                                                                                                                                                                                               |                                                                        |
| PHYB-F      | 5'- aatctaga ATGGCCTCGGGTAGCCG-3'                                                                                                                                                                                                                                                                                | For PHYB-GFP construct                                                 |
| PHYB-R      | 5'- atggtacc GCTTGTCCTTACTT G-3'                                                                                                                                                                                                                                                                                 |                                                                        |
| eGFP-F      | 5'- aaggtcaccATGGTGAGCAAGGGCGAG-3'                                                                                                                                                                                                                                                                               | For eGFP amplification                                                 |
| eGFP-R      | 5'- atggtcaccT TACTTGTACAGCTCGTCCATG-3'                                                                                                                                                                                                                                                                          |                                                                        |
| pMIR530-A   | <u>gagctcCGGTCTTGGACGAGAAAGCAGCTTTGATACGCAAATCTTT</u><br><u>AGCTGCCGTTGAACGGCCGGCCAAATCCGACAGAACGAAGCTT</u><br><u>TTGGCTACATCTACATGTGACATGTACTGCAGCAGCTAGCAAT</u><br><u>ATATCCAACATTGTTGCTAGCTAACTGATCCACGTGTAAACCGG</u><br><u>CACGTGTCGCCGTGCCATTGGCCTGCCGTGCAAGTCCCATGTGA</u><br><u>ACCGTGGCGATGTGCctcgag</u>  | For yeast one-hybrid (Fragment A, G-box were underlined)               |
| pMIR530-Am  | <u>gagctcCGGTCTTGGACGAGAAAGCAGCTTTGATACGCAAATCTTT</u><br><u>AGCTGCCGTTGAACGGCCGGCCAAATCCGACAGAACGAAGCTT</u><br><u>TTGGCTACATCTACATGTGACATGTACTGCAGCAGCTAGCAAT</u><br><u>ATATCCAACATTGTTGCTAGCTAACTGATCTGACTTTAAACCGG</u><br><u>TGACTTTTCGCCGTGCCATTGGCCTGCCGTGCAAGTCCCATGTGA</u><br><u>ACCGTGGCGATGTGCctcgag</u> | For yeast one-hybrid (mutant fragment A, mutant G-box were underlined) |
| pMIR530-B   | <u>gagctcCGACAGGTAATATGGGACAGAGGTTAGTAGATATTTCCC</u><br><u>ACGTGCACTACAGATGGTTTCTCTTAGAAGCTGCTAGCTAGCTct</u><br><u>cgag</u>                                                                                                                                                                                      | For yeast one-hybrid (Fragment B, G-box were underlined)               |
| pMIR530-Bm  | <u>gagctcCGACAGGTAATATGGGACAGAGGTTAGTAGATATTTCCCT</u><br><u>GACTTCACTACAGATGGTTTCTCTTAGAAGCTGCTAGCTAGCTct</u><br><u>cgag</u>                                                                                                                                                                                     | For yeast one-hybrid (mutant fragment B, mutant G-box were underlined) |
| Probe A-F   | 5'-TGATCCACGTGTAAACCGGCACGTGTCGCC-3'                                                                                                                                                                                                                                                                             | For EMSA assay (Probe A, G-box were underlined)                        |
| Probe A-R   | 5'-GGCGACACGTGCCGTTTACACGTGGATCA-3'                                                                                                                                                                                                                                                                              |                                                                        |
| Probe Am-F  | 5'-TGATCTGACTTTAAACCGGTGACTTTCGCC-3'                                                                                                                                                                                                                                                                             | For EMSA assay (mutant probe A, mutant G-box were underlined)          |
| Probe Am-R  | 5'-GGCGAAAGTCACCGGTTTAAAGTCAGATCA-3'                                                                                                                                                                                                                                                                             |                                                                        |
| Probe B-F   | 5'- ATTTTCCCACGTGCACTACAGATGGTT -3'                                                                                                                                                                                                                                                                              | For EMSA assay (Probe B, G-box were underlined)                        |
| Probe B-R   | 5'- AACCATCTGTAGTGCACGTGGGAAAAT -3'                                                                                                                                                                                                                                                                              |                                                                        |

|                            |                                                  |                                                               |
|----------------------------|--------------------------------------------------|---------------------------------------------------------------|
| Probe Bm-F                 | 5'- ATTTTCCTGACTTCACTATGACTTGTT -3'              | For EMSA assay (mutant probe B, mutant G-box were underlined) |
| Probe Bm-R                 | 5'- AACAAAGTCATAGTGAAGTCAGGAAAAT-3'              |                                                               |
| PHYB-1300-nLUC-Infusion-F  | 5'-TCGGTACCCGGGATCCAATGGCCTCGGGTAGCCGC-3'        | For LCI assay                                                 |
| PHYB-1300-nLUC-Infusion-R  | 5'-ACGAGATCTGGTCGACTCAGCTTGCCCCCTACTTGCTG-3'     |                                                               |
| PIL15-1300-cLUC-Infusion-F | 5'-GCGGTACCCGGGATCCAATGTCCGACGGCAACGACTTC-3'     | For LCI assay                                                 |
| PIL15-1300-cLUC-Infusion-R | 5'-AGCTCTGCAGGTCGACTTATGTTTTAGCCCCATCTCTCTCT-3'  |                                                               |
| OsPIL15NdeF1               | 5'-CAC ATA TGT CCG ACG GCA ACG ACT-3'            | For yeast one-hybrid and two-hybrid assays                    |
| OsPIL15LxhoR1              | 5'-ATC TCG AGT GTT TCA GCC CCA TCT CTC-3'        |                                                               |
| phyB-C-F                   | 5'-AACCATGGCAGAGGGCACAAGTAAC-3'                  | For yeast two-hybrid assay                                    |
| phyB-C-R                   | 5'-ATCTGCAGCTTGCCCCCTACTTG-3'                    |                                                               |
| PIL15-Infusion-F           | 5'-CGAAATCGATGGATCCTATGTCCGACGGCAACGACTTC-3'     | For Luciferase activity assay                                 |
| PIL15-Infusion-R           | 5'-ATTCGAGCTCACTAGTTTTATGTTTCAGCCCCATCTCTCTCT-3' |                                                               |
| p530-LUC-F                 | 5'-caccAGGAAGCGGATTACATAGAAC-3'                  | Luciferase activity assay                                     |
| p530-LUC-R                 | 5'-GCTCTATCACACATCACTTGC-3'                      |                                                               |
| p530Chip-AF                | 5'-GCTTTTGGCTACATCTACAT-3'                       | For ChIP-qPCR (Fragment A)                                    |
| p530Chip-AR                | 5'-CGGTTACATGGGACTTG-3'                          |                                                               |
| p530Chip-BF                | 5'-GGTAATATGGGACAGAGGTA-3'                       | For ChIP-qPCR (Fragment B)                                    |
| p530Chip-BR                | 5'-GAACTATTGTCGATGGGTT-3'                        |                                                               |
| p530Chip-CF                | 5'-TTGACAACCGGCACCTAA-3'                         | For ChIP-qPCR (Fragment C)                                    |
| p530Chip-CR                | 5'-AAACATTTATGGGCTTATCGCTAT-3'                   |                                                               |
| PL3-GSP1                   | 5'-AACAGGATTCACAGCAGACACG-3'                     | For RLM5' -RACE                                               |
| PL3-GSP2                   | 5'-AGCCCATCCTTATGCTTTTCCTG-3'                    | For RLM5' -RACE                                               |
| PL3-TS                     | 5'-cgggatccATGAGATCTGTCTCTGAGCTGGTG-3'           | For subcellular localization of OsPL3                         |
| PL3-TAS                    | 5'-gctctagaAAAACGAAGCAGCTCTCTT-3'                |                                                               |
| PL3-RS                     | 5'-AAGCTGTGAAATGAGATG-3'                         | For detection of <i>OsPL3</i> expression by qRT-PCR           |
| PL3-RAS                    | 5'-ATGCCGAATATTATGACTG-3'                        |                                                               |
